# Supplementary material for: An Assessment of the Effectiveness and Safety of Chimeric Antigen Receptor T-Cell Therapy in Multiple Myeloma Patients with Relapsed or Refractory Disease: A Systematic Review and Meta-Analysis
Source: MDPI journal article supplement (doi:10.3390/ijms25094996), 2024-05-03
Supplement: s1 [file s1]

# Assessment of the effectiveness and safety of CAR-T cell therapy in multiple myeloma patients with relapsed or refractory disease: a systematic review and meta-analysis – Supplementary materials

**Document S1:** PRISMA 2020 checklist.

| Section and Topic       | Item # | Checklist item                                                                                                                                                                                                                                                                   | Location where item is reported |
|-------------------------|--------|----------------------------------------------------------------------------------------------------------------------------------------------------------------------------------------------------------------------------------------------------------------------------------|---------------------------------|
| <b>TITLE</b>            |        |                                                                                                                                                                                                                                                                                  |                                 |
| Title                   | 1      | Identify the report as a systematic review.                                                                                                                                                                                                                                      | Page 1                          |
| <b>ABSTRACT</b>         |        |                                                                                                                                                                                                                                                                                  |                                 |
| Abstract                | 2      | See the PRISMA 2020 for Abstracts checklist.                                                                                                                                                                                                                                     | Page 1                          |
| <b>INTRODUCTION</b>     |        |                                                                                                                                                                                                                                                                                  |                                 |
| Rationale               | 3      | Describe the rationale for the review in the context of existing knowledge.                                                                                                                                                                                                      | Pages 1-2                       |
| Objectives              | 4      | Provide an explicit statement of the objective(s) or question(s) the review addresses.                                                                                                                                                                                           | Page 2-3                        |
| <b>METHODS</b>          |        |                                                                                                                                                                                                                                                                                  |                                 |
| Eligibility criteria    | 5      | Specify the inclusion and exclusion criteria for the review and how studies were grouped for the syntheses.                                                                                                                                                                      | Page 3                          |
| Information sources     | 6      | Specify all databases, registers, websites, organisations, reference lists and other sources searched or consulted to identify studies. Specify the date when each source was last searched or consulted.                                                                        | Page 3                          |
| Search strategy         | 7      | Present the full search strategies for all databases, registers and websites, including any filters and limits used.                                                                                                                                                             | Page 3, Table S1                |
| Selection process       | 8      | Specify the methods used to decide whether a study met the inclusion criteria of the review, including how many reviewers screened each record and each report retrieved, whether they worked independently, and if applicable, details of automation tools used in the process. | Page 3-4                        |
| Data collection process | 9      | Specify the methods used to collect data from reports, including how many reviewers collected data from each report, whether they worked independently, any processes for obtaining or confirming data from study investigators, and if                                          | Pages 4                         |

| Section and Topic             | Item # | Checklist item                                                                                                                                                                                                                                                                | Location where item is reported |
|-------------------------------|--------|-------------------------------------------------------------------------------------------------------------------------------------------------------------------------------------------------------------------------------------------------------------------------------|---------------------------------|
|                               |        | applicable, details of automation tools used in the process.                                                                                                                                                                                                                  |                                 |
| Data items                    | 10a    | List and define all outcomes for which data were sought. Specify whether all results that were compatible with each outcome domain in each study were sought (e.g. for all measures, time points, analyses), and if not, the methods used to decide which results to collect. | Page 4                          |
|                               | 10b    | List and define all other variables for which data were sought (e.g. participant and intervention characteristics, funding sources). Describe any assumptions made about any missing or unclear information.                                                                  | Page 4                          |
| Study risk of bias assessment | 11     | Specify the methods used to assess risk of bias in the included studies, including details of the tool(s) used, how many reviewers assessed each study and whether they worked independently, and if applicable, details of automation tools used in the process.             | Page 4                          |
| Effect measures               | 12     | Specify for each outcome the effect measure(s) (e.g. risk ratio, mean difference) used in the synthesis or presentation of results.                                                                                                                                           | Page 4                          |
| Synthesis methods             | 13a    | Describe the processes used to decide which studies were eligible for each synthesis (e.g. tabulating the study intervention characteristics and comparing against the planned groups for each synthesis (item #5)).                                                          | Pages 4                         |
|                               | 13b    | Describe any methods required to prepare the data for presentation or synthesis, such as handling of missing summary statistics, or data conversions.                                                                                                                         | Page 4                          |
|                               | 13c    | Describe any methods used to tabulate or visually display results of individual studies and syntheses.                                                                                                                                                                        | Page 4                          |
|                               | 13d    | Describe any methods used to synthesize results and provide a rationale for the choice(s). If meta-analysis was performed, describe the model(s), method(s) to identify the presence and extent of statistical heterogeneity, and software package(s) used.                   | Page 4                          |
|                               | 13e    | Describe any methods used to explore possible causes of heterogeneity among study results (e.g. subgroup analysis, meta-regression).                                                                                                                                          | Page 4                          |
|                               | 13f    | Describe any sensitivity analyses conducted to assess robustness of the synthesized results.                                                                                                                                                                                  | Not applicable                  |
| Reporting bias assessment     | 14     | Describe any methods used to assess risk of bias due to missing results in a synthesis (arising from reporting biases).                                                                                                                                                       | Page 4                          |
| Certainty                     | 15     | Describe any methods used to assess certainty (or confidence) in the body of evidence for an outcome.                                                                                                                                                                         | Page 4                          |

| Section and Topic             | Item # | Checklist item                                                                                                                                                                                                                                                                       | Location where item is reported       |
|-------------------------------|--------|--------------------------------------------------------------------------------------------------------------------------------------------------------------------------------------------------------------------------------------------------------------------------------------|---------------------------------------|
| assessment                    |        |                                                                                                                                                                                                                                                                                      |                                       |
| <b>RESULTS</b>                |        |                                                                                                                                                                                                                                                                                      |                                       |
| Study selection               | 16a    | Describe the results of the search and selection process, from the number of records identified in the search to the number of studies included in the review, ideally using a flow diagram.                                                                                         | Page 5, Figure 1                      |
|                               | 16b    | Cite studies that might appear to meet the inclusion criteria, but which were excluded, and explain why they were excluded.                                                                                                                                                          | Figure 1                              |
| Study characteristics         | 17     | Cite each included study and present its characteristics.                                                                                                                                                                                                                            | Pages 5-6, Tables S2-4 and 1-2        |
| Risk of bias in studies       | 18     | Present assessments of risk of bias for each included study.                                                                                                                                                                                                                         | Page 20-21, Table S5                  |
| Results of individual studies | 19     | For all outcomes, present, for each study: (a) summary statistics for each group (where appropriate) and (b) an effect estimate and its precision (e.g. confidence/credible interval), ideally using structured tables or plots.                                                     | Pages 14-17, Figures S1-2 and 2-8     |
| Results of syntheses          | 20a    | For each synthesis, briefly summarise the characteristics and risk of bias among contributing studies.                                                                                                                                                                               | Page 20-21, Table S5                  |
|                               | 20b    | Present results of all statistical syntheses conducted. If meta-analysis was done, present for each the summary estimate and its precision (e.g. confidence/credible interval) and measures of statistical heterogeneity. If comparing groups, describe the direction of the effect. | Pages 14-17, Figures S1-2, and 2-8    |
|                               | 20c    | Present results of all investigations of possible causes of heterogeneity among study results.                                                                                                                                                                                       | Page 17, Table 3, Figures S3 and 9-12 |
|                               | 20d    | Present results of all sensitivity analyses conducted to assess the robustness of the synthesized results.                                                                                                                                                                           | Not applicable                        |
| Reporting biases              | 21     | Present assessments of risk of bias due to missing results (arising from reporting biases) for each synthesis assessed.                                                                                                                                                              | Page 20-21, Figure 13                 |
| Certainty of                  | 22     | Present assessments of certainty (or confidence) in the body of evidence for each outcome assessed.                                                                                                                                                                                  | Figures S1-3                          |

| Section and Topic                              | Item # | Checklist item                                                                                                                                                                                                                             | Location where item is reported |
|------------------------------------------------|--------|--------------------------------------------------------------------------------------------------------------------------------------------------------------------------------------------------------------------------------------------|---------------------------------|
| evidence                                       |        |                                                                                                                                                                                                                                            | and 2-8                         |
| <b>DISCUSSION</b>                              |        |                                                                                                                                                                                                                                            |                                 |
| Discussion                                     | 23a    | Provide a general interpretation of the results in the context of other evidence.                                                                                                                                                          | Pages 21-24                     |
|                                                | 23b    | Discuss any limitations of the evidence included in the review.                                                                                                                                                                            | Pages 21-24                     |
|                                                | 23c    | Discuss any limitations of the review processes used.                                                                                                                                                                                      | Pages 21-24                     |
|                                                | 23d    | Discuss implications of the results for practice, policy, and future research.                                                                                                                                                             | Pages 21-24                     |
| <b>OTHER INFORMATION</b>                       |        |                                                                                                                                                                                                                                            |                                 |
| Registration and protocol                      | 24a    | Provide registration information for the review, including register name and registration number, or state that the review was not registered.                                                                                             | Not applicable                  |
|                                                | 24b    | Indicate where the review protocol can be accessed, or state that a protocol was not prepared.                                                                                                                                             | Not applicable                  |
|                                                | 24c    | Describe and explain any amendments to information provided at registration or in the protocol.                                                                                                                                            | Not applicable                  |
| Support                                        | 25     | Describe sources of financial or non-financial support for the review, and the role of the funders or sponsors in the review.                                                                                                              | Page 25                         |
| Competing interests                            | 26     | Declare any competing interests of review authors.                                                                                                                                                                                         | Page 25                         |
| Availability of data, code and other materials | 27     | Report which of the following are publicly available and where they can be found: template data collection forms; data extracted from included studies; data used for all analyses; analytic code; any other materials used in the review. | Page 25                         |

**Table S1.** Search strategy.

| Database              | Search query                                                                                                                                                                                                                                                                                                                                                                                                                                                                                                                                                                                                                                                      | Total results |
|-----------------------|-------------------------------------------------------------------------------------------------------------------------------------------------------------------------------------------------------------------------------------------------------------------------------------------------------------------------------------------------------------------------------------------------------------------------------------------------------------------------------------------------------------------------------------------------------------------------------------------------------------------------------------------------------------------|---------------|
| <b>PubMed</b>         | ("multiple myeloma" [MeSH Terms] OR "multiple myeloma"[Title/Abstract] OR "relapsed multiple myeloma"[Title/Abstract] OR "refractory multiple myeloma"[Title/Abstract]) AND ("immunotherapy, adoptive"[MeSH Terms] OR "car t cell"[Title/Abstract] OR "chimeric antigen receptor T-cell therapy"[Title/Abstract] OR "car t immunotherapy"[Title/Abstract])                                                                                                                                                                                                                                                                                                        | 705           |
| <b>Scopus</b>         | TITLE-ABS-KEY (("multiple myeloma" OR "relapsed multiple myeloma" OR "refractory multiple myeloma") AND ("immunotherapy, adoptive" OR "car t cell" OR "chimeric antigen receptor T-cell therapy" OR "car t immunotherapy"))                                                                                                                                                                                                                                                                                                                                                                                                                                       | 974           |
| <b>Web of Science</b> | (TI=("multiple myeloma" OR "relapsed multiple myeloma" OR "refractory multiple myeloma") OR AB=("multiple myeloma" OR "relapsed multiple myeloma" OR "refractory multiple myeloma") OR KP=( "multiple myeloma" OR "relapsed multiple myeloma" OR "refractory multiple myeloma")) AND (TI= ("immunotherapy, adoptive" OR "car t cell" OR "chimeric antigen receptor T-cell therapy" OR "car t immunotherapy") OR AB= ("immunotherapy, adoptive" OR "car t cell" OR "chimeric antigen receptor T-cell therapy" OR "car t immunotherapy") OR KP= ("immunotherapy, adoptive" OR "car t cell" OR "chimeric antigen receptor T-cell therapy" OR "car t immunotherapy")) | 594           |

**Table S2.** Characteristics of the included studies.

| First author   | Publication year | Study design                       | Production name                                 | Registration number                | Study phase | Country                                                    | Sample size |
|----------------|------------------|------------------------------------|-------------------------------------------------|------------------------------------|-------------|------------------------------------------------------------|-------------|
| <b>Raje</b>    | 2019             | Prospective study (clinical trial) | Idecabtagene vicleucel/idecel/bb2121, (CRB-401) | NCT02658929                        | Phase 1     | USA                                                        | 33          |
| <b>Xu</b>      | 2019             | Prospective study (clinical trial) | LCAR-B38M                                       | NCT03090659<br>ChiCTR-ONH-17012285 | Phase 1     | China                                                      | 17          |
| <b>Cohen</b>   | 2019             | Prospective study (clinical trial) | CART-BCMA                                       | NCT02546167                        | Phase 1     | USA                                                        | 25          |
| <b>Yan</b>     | 2020             | Prospective study (clinical trial) | CD19 & BCMA CAR-T                               | NCT03196414                        | Phase 1     | China                                                      | 10          |
| <b>Chen</b>    | 2020             | Prospective study (clinical trial) | CD19 & BCMA CAR-T cells                         | ChiCTROIC-17011272                 | Phase 2     | China                                                      | 7           |
| <b>Wang</b>    | 2021             | Prospective study (clinical trial) | CT103A                                          | ChiCTR1800018137                   | Phase 1     | China                                                      | 18          |
| <b>Cornell</b> | 2021             | Prospective study (clinical trial) | KITE-585 CAR                                    | NCT03318861                        | Phase 1     | USA                                                        | 14          |
| <b>Mei</b>     | 2021             | Prospective study (clinical trial) | BM38 CAR                                        | ChiCTR1800018143                   | Phase 1     | China                                                      | 23          |
| <b>Munshi</b>  | 2021             | Prospective study (clinical trial) | idecabtagene vicleucel/ idecel/ bb2121 (KarMMA) | NCT03361748                        | Phase 2     | USA, Canada, Belgium, France, Germany, Italy, Japan, Spain | 128         |
| <b>Zhang</b>   | 2022             | Prospective study (clinical trial) | BCMA & CD38 CAR-T cells                         | ChiCTR1800017051                   | Phase 2     | China                                                      | 22          |
| <b>Du</b>      | 2022             | Prospective study (clinical trial) | BCMA CAR/ HDS269B                               | NCT03093168                        | Phase 1/2   | China                                                      | 49          |

|                   |      |                                       |                                                                                     |                                                          |            |                                                                                  |    |
|-------------------|------|---------------------------------------|-------------------------------------------------------------------------------------|----------------------------------------------------------|------------|----------------------------------------------------------------------------------|----|
| <b>Wang</b>       | 2022 | Prospective study<br>(clinical trial) | CD19 & BCMA CAR-T cells                                                             | ChiCTROIC-17011272                                       | Phase 2    | China                                                                            | 62 |
| <b>Zhao</b>       | 2022 | Prospective study<br>(clinical trial) | LCAR-B38M (LEGEND-2)                                                                | NCT03090659<br>ChiCTR-ONH-17012285                       | Phase 1    | China                                                                            | 74 |
| <b>Mailankody</b> | 2022 | Prospective study<br>(clinical trial) | GPRC5D CAR-T cells/<br>MCARH109                                                     | NCT04555551                                              | Phase 1    | USA                                                                              | 17 |
| <b>Qu</b>         | 2022 | Prospective study<br>(clinical trial) | C-CAR088                                                                            | NCT03815383<br>NCT03751293<br>NCT04295018<br>NCT04322292 | Phase 1    | China                                                                            | 31 |
| <b>Tang</b>       | 2022 | Prospective study<br>(clinical trial) | BCMA & CD38 CAR-T cells                                                             | ChiCTR1900026286                                         | Phase 1    | China                                                                            | 16 |
| <b>Ri</b>         | 2022 | Prospective study<br>(clinical trial) | Ciltacabtagene<br>autoleucel/cilta-cel/ JNJ-<br>68284528 (CARTITUDE-1)              | NCT03548207                                              | Phase 2    | Japan                                                                            | 9  |
| <b>Martin</b>     | 2022 | Prospective study<br>(clinical trial) | Ciltacabtagene<br>autoleucel/cilta-cel/ JNJ-<br>68284528 (CARTITUDE-1)              | NCT03548207                                              | Phase 1b/2 | USA                                                                              | 97 |
| <b>Mi</b>         | 2022 | Prospective study<br>(clinical trial) | Ciltacabtagene<br>autoleucel/cilta-cel/ JNJ-<br>68284528 (CARTIFAN-1)               | NCT03758417                                              | Phase 2    | China                                                                            | 48 |
| <b>Asherie</b>    | 2022 | Prospective study<br>(clinical trial) | HBI0101                                                                             | NCT04720313                                              | Phase 1    | Israel                                                                           | 20 |
| <b>Cohen</b>      | 2023 | Prospective study<br>(clinical trial) | Ciltacabtagene<br>autoleucel/cilta-cel/ JNJ-<br>68284528 (CARTITUDE-2,<br>cohort C) | NCT04133636                                              | Phase 2    | USA, Belgium,<br>France, Germany,<br>Israel, Netherlands,<br>Saudi Arabia, Spain | 20 |
| <b>Xia</b>        | 2023 | Prospective study<br>(clinical trial) | GPRC5D CAR-T cells                                                                  | ChiCTR2100048888                                         | Phase 2    | China                                                                            | 33 |
| <b>Mailankody</b> | 2023 | Prospective study<br>(clinical trial) | ALLO-715 (UNIVERSAL,<br>cohort A)                                                   | NCT04093596                                              | Phase 1    | USA                                                                              | 43 |

|                      |      |                                       |                                                   |             |           |                 |     |
|----------------------|------|---------------------------------------|---------------------------------------------------|-------------|-----------|-----------------|-----|
| <b>Lee</b>           | 2023 | Prospective study (clinical trial)    | APRIL CAR-T cells (AUTO2)                         | NCT03287804 | Phase 1   | UK, Netherlands | 11  |
| <b>Oliver-Caldés</b> | 2023 | Prospective study (clinical trial)    | ARI0002h (CARTBCMA-HBC-01)                        | NCT04309981 | Phase 1/2 | Spain           | 30  |
| <b>Zhang</b>         | 2023 | Prospective study (clinical trial)    | GPRC5D CAR-T cells/ OriCAR-017 (POLARIS)          | NCT05016778 | Phase 1   | China           | 10  |
| <b>Minakata</b>      | 2023 | Prospective study (clinical trial)    | idecabtagene vicleucel/ ide-cel/ bb2121, (KarMMa) | NCT03361748 | Phase 2   | Japan           | 9   |
| <b>Sanoyan</b>       | 2023 | Retrospective study (real-world data) | idecabtagene/ide-cel/bb2121                       | NA          | NA        | Switzerland     | 16  |
| <b>Hansen</b>        | 2023 | Retrospective study (real-world data) | idecabtagene/ide-cel/ bb2121                      | NA          | NA        | USA             | 159 |

NA: Not Applicable; NR: Not Reported.



**Table S3.** Continued: Characteristics of the included studies.

| First author,<br>year | Target antigen | T cell source            | Gene transfer method | Costimulatory domain | scFv species                                | CAR-T cell generation |
|-----------------------|----------------|--------------------------|----------------------|----------------------|---------------------------------------------|-----------------------|
| <b>Raje 2019</b>      | BCMA           | Autologous               | Lentivirus           | 4-1BB                | Murine                                      | Second-generation     |
| <b>Xu 2019</b>        | BCMA           | Autologous               | Lentivirus           | 4-1BB                | Llama                                       | Second-generation     |
| <b>Cohen 2019</b>     | BCMA           | Autologous               | Lentivirus           | 4-1BB                | Human                                       | Second-generation     |
| <b>Yan 2020</b>       | BCMA, CD19     | Autologous<br>Allogeneic | Lentivirus           | 4-1BB/OX40           | Humanized                                   | Third-generation      |
| <b>Chen 2020</b>      | BCMA, CD19     | Autologous               | Lentivirus           | 4-1BB                | Anti-CD19 - Humanized<br>Anti-BCMA - Murine | Third-generation      |
| <b>Wang 2021</b>      | BCMA           | Autologous               | Lentivirus           | 4-1BB                | Human                                       | Second-generation     |
| <b>Cornell 2021</b>   | BCMA           | Autologous               | Lentivirus           | CD28                 | Human                                       | Second-generation     |
| <b>Mei 2021</b>       | BCMA, CD38     | Autologous               | Lentivirus           | 4-1BB                | Anti-BCMA - Human<br>Anti-CD38 - Humanized  | Second-generation     |
| <b>Munshi 2021</b>    | BCMA           | Autologous               | Lentivirus           | 4-1BB                | Murine                                      | Second-generation     |
| <b>Zhang 2022</b>     | BCMA, CD38     | Autologous               | Lentivirus           | 4-1BB                | Anti-BCMA - Humanized<br>Anti-CD38 - Murine | Second-generation     |
| <b>Du 2022</b>        | BCMA           | Autologous               | Retrovirus           | 4-1BB                | Murine                                      | Second-generation     |
| <b>Wang 2022</b>      | BCMA, CD19     | Autologous               | Lentivirus           | 4-1BB                | Anti-CD19 – Humanized<br>Anti-BCMA – Murine | Third-generation      |

|                           |            |            |            |            |           |                   |
|---------------------------|------------|------------|------------|------------|-----------|-------------------|
| <b>Zhao 2022</b>          | BCMA       | Autologous | Lentivirus | 4-1BB      | Llama     | Second-generation |
| <b>Mailankody 2022</b>    | GPRC5D     | Autologous | Lentivirus | 4-1BB      | Human     | Second-generation |
| <b>Qu 2022</b>            | BCMA       | Autologous | Lentivirus | 4-1BB      | Human     | Second-generation |
| <b>Tang 2022</b>          | BCMA, CD38 | Autologous | Lentivirus | 4-1BB      | NR        | Second-generation |
| <b>Ri 2022</b>            | BCMA       | Autologous | Lentivirus | 4-1BB      | Llama     | Second-generation |
| <b>Martin 2022</b>        | BCMA       | Autologous | Lentivirus | 4-1BB      | Llama     | Second-generation |
| <b>Mi 2022</b>            | BCMA       | Autologous | Lentivirus | 4-1BB      | Llama     | Second-generation |
| <b>Asherie 2022</b>       | BCMA       | Autologous | Retrovirus | 4-1BB      | Murine    | Second-generation |
| <b>Cohen 2023</b>         | BCMA       | Autologous | Lentivirus | 4-1BB      | Llama     | Second-generation |
| <b>Xia 2023</b>           | GPRC5D     | Autologous | Lentivirus | 4-1BB      | Human     | Second-generation |
| <b>Mailankody 2023</b>    | BCMA       | Allogeneic | Lentivirus | 4-1BB      | Human     | Second-generation |
| <b>Lee 2023</b>           | BCMA, TACI | Autologous | Retrovirus | CD28, OX40 | NR        | Third-generation  |
| <b>Oliver-Caldés 2023</b> | BCMA       | Autologous | Lentivirus | 4-1BB      | Humanized | Second-generation |
| <b>Zhang 2023</b>         | GPRC5D     | Autologous | Lentivirus | 4-1BB      | Llama     | Second-generation |

|                      |      |            |            |       |        |                   |
|----------------------|------|------------|------------|-------|--------|-------------------|
| <b>Minakata 2023</b> | BCMA | Autologous | Lentivirus | 4-1BB | Murine | Second-generation |
| <b>Sanoyan 2023</b>  | BCMA | Autologous | Lentivirus | 4-1BB | Murine | Second-generation |
| <b>Hansen 2023</b>   | BCMA | Autologous | Lentivirus | 4-1BB | Murine | Second-generation |

NR: Not Reported.

**Table S4.** Initial qualities of the enrolled participants.

| First author, year  | Age, median (range),<br>y | Male/female | Race | Median time since diagnosis<br>(range) | ECOG PS score, number<br>(%)            | ISS staging, number<br>(%)                                      |
|---------------------|---------------------------|-------------|------|----------------------------------------|-----------------------------------------|-----------------------------------------------------------------|
| <b>Raje 2019</b>    | 60 (37-75)                | 21/12       | NR   | 5y (1-36)                              | 0 – 10 (30)<br>1 – 21 (64)<br>2 – 2 (6) | I – 7 (21)<br>II – 14 (42)<br>III – 8 (24)<br>Unknown – 4 (12)  |
| <b>Xu 2019</b>      | 55 (35-73)                | 11/6        | NR   | NR                                     | NR                                      | NR                                                              |
| <b>Cohen 2019</b>   | 58 (44-75)                | 17/8        | NR   | 4.6y (1.8-14.5)                        | NR                                      | NR                                                              |
| <b>Yan 2020</b>     | 56 (43-69)                | 7/3         | NR   | NR                                     | NR                                      | NR                                                              |
| <b>Chen 2020</b>    | 49 (41-55)                | 7/0         | NR   | 23.5m (7.9-34.2)                       | NR                                      | I – 2 (29)<br>II – 2 (29)<br>III – 3 (43)                       |
| <b>Wang 2021</b>    | 53.5 (38-66)              | 10/8        | NR   | 31.9m (8.80-94.3)                      | 0 – 3 (17)<br>1 – 15 (83)               | I – 10 (56)<br>II – 8 (44)<br>III – 0                           |
| <b>Cornell 2021</b> | 56 (47-71)                | 10/7        | NR   | 61m (27-134)                           | 1 – 7 (41)                              | I/II – 7 (41)<br>III – 4 (24)<br>Unknown – 6 (35)               |
| <b>Mei 2021</b>     | 59 (49-72)                | 11/12       | NR   | 2.9y (0.4-13.4)                        | 0-2 – 19 (83)<br>3-4 – 4 (17)           | I – 6 (26)<br>II – 6 (26)<br>III – 11 (48)                      |
| <b>Munshi 2021</b>  | 61 (33-78)                | 76/52       | NR   | 6y (1-18)                              | 0 – 57 (45)<br>1 – 68 (53)<br>2 – 3 (2) | I – 14 (11)<br>II – 90 (70)<br>III – 21 (16)<br>Unknown – 3 (2) |

|                        |              |       |                                                                                                                                       |                  |                                                                       |                                                                              |
|------------------------|--------------|-------|---------------------------------------------------------------------------------------------------------------------------------------|------------------|-----------------------------------------------------------------------|------------------------------------------------------------------------------|
| <b>Zhang 2022</b>      | 56 (47-68)   | 9/13  | NR                                                                                                                                    | NR               | NR                                                                    | I – 0 (0)<br>II – 17 (77.3)<br>III – 5 (22.7)                                |
| <b>Du 2022</b>         | 57 (37-75)   | 26/23 | NR                                                                                                                                    | 2.7y (0.3-12.6)  | 0/1 – 17 (34.69)<br>2 – 12 (22.49)<br>3 – 14 (28.57)<br>4 – 6 (12.25) | I – 6 (12.24)<br>II – 20 (40.82)<br>III – 13 (26.53)<br>Unknown – 10 (20.41) |
| <b>Wang 2022</b>       | 58 (30-69)   | 34/28 | NR                                                                                                                                    | 30m (8-167)      | NR                                                                    | I – 8 (13)<br>II – 24 (39)<br>III – 30 (48)                                  |
| <b>Zhao 2022</b>       | 54.5 (27-74) | 45/29 | NR                                                                                                                                    | 4.0y (1-9)       | 0 – 30 (40.5)<br>1 – 32 (43.2)<br>2 – 12 (16.2)                       | I – 33 (44.6)<br>II – 14 (18.9)<br>III – 21 (28.4)<br>Unknown – 6 (8.1)      |
| <b>Mailankody 2022</b> | 60 (38-76)   | 13/4  | NR                                                                                                                                    | NR               | NR                                                                    | NR                                                                           |
| <b>Qu 2022</b>         | 61 (45-74)   | 17/14 | NR                                                                                                                                    | NR               | 0 – 19 (61.3)<br>1 – 12 (38.7)                                        | I – 4 (12.9)<br>II – 21 (67.7)<br>III – 5 (16.2)<br>Unknown – 1 (3.2)        |
| <b>Tang 2022</b>       | 58.5 (48-78) | NR    | NR                                                                                                                                    | 28.5m (4-72)     | NR                                                                    | I – 2 (12.5)<br>II – 1 (6.25)<br>III – 13 (81.3)                             |
| <b>Ri 2022</b>         | 57 (45-71)   | 5/4   | Asian, 9 (100)                                                                                                                        | 5.41y (3.8-11.3) | 0 – 7 (77.8)<br>1 – 1 (11.1)<br>2 – 1 (11.1)                          | I – 5 (55.6)<br>II – 3 (33.3)<br>III – 1 (11.1)                              |
| <b>Martin 2022</b>     | 61 (56-68)   | 57/40 | White, 69 (71);<br>Black or African<br>American, 17<br>(18); Asian, 1 (1);<br>American<br>Indian or Alaska<br>native, 1(1);<br>Native | 5.9y (4.4-8.4)   | 0 – 39 (40)<br>1 – 54 (56)<br>2 – 4 (4)                               | I – 61 (63)<br>II – 22 (23)<br>III – 14 (14)                                 |

|                               |              |       |                                                                                                                                         |                  |                                                 |                                                                        |
|-------------------------------|--------------|-------|-----------------------------------------------------------------------------------------------------------------------------------------|------------------|-------------------------------------------------|------------------------------------------------------------------------|
|                               |              |       | Hawaiian or<br>other Pacific<br>Islander, 1(1);<br>Not reported, 8<br>(8)                                                               |                  |                                                 |                                                                        |
| <b>Mi 2022</b>                | 61 (30-72)   | 32/16 | NR                                                                                                                                      | 3.7y (1.4-10.2)  | 0 – 22 (45.8)<br>1 – 26 (54.2)                  | I – 21 (43.8)<br>II – 18 (37.5)<br>III – 9 (18.8)                      |
| <b>Asherie 2022</b>           | 62 (44-75)   | 8/12  | NR                                                                                                                                      | 55m (8-241)      | 0 – 7 (35)<br>1 – 4 (20)<br>2 – 9 (45)          | I – 1 (5)<br>II – 11 (55)<br>III – 2 (10)                              |
| <b>Cohen 2023</b>             | 62.5 (44-81) | 12/8  | White, 19 (95);<br>Black, 1 (5)                                                                                                         | 6.3y (2.5-16.3)  | 0 – 8 (40)<br>1 – 12 (60)                       | I – 8 (40)<br>II – 4 (20)<br>III – 8 (40)                              |
| <b>Xia 2023</b>               | 58 (39-70)   | 18/15 | NR                                                                                                                                      | 31.5m (4.8-96.0) | NR                                              | I – 6 (18)<br>II – 15 (45)<br>III – 12 (36)                            |
| <b>Mailankody 2023</b>        | 64 (46-77)   | 27/16 | White, 35 (81.4);<br>Black or African<br>American, 5<br>(11.6); Asian, 2<br>(4.7); Native<br>Hawaiian or<br>Pacific Islander,<br>1(2.3) | 4.9y (0.9-26.4)  | 0 – 21 (48.8)<br>1 – 22 (51.2)                  | I – 12 (27.9)<br>II – 22 (51.2)<br>III – 8 (18.6)<br>Unknown – 1 (2.3) |
| <b>Lee 2023</b>               | 61 (45-69)   | 8/3   | NR                                                                                                                                      | 6y (1-11)        | NR                                              | I – 6 (54.5)<br>II – 1 (9.1)<br>III – 3 (27.3)<br>Unknown – 1 (9.1)    |
| <b>Oliver-Caldés<br/>2023</b> | 61 (53-65)   | 18/12 | NR                                                                                                                                      | 4.7y (3.7-9.1)   | 0 – 18/29 (62)<br>1 – 9/29 (31)<br>2 – 2/29 (7) | I – 5/25 (20)<br>II – 8/25 (32)<br>III – 12/25 (48)                    |

|                      |            |       |                      |                 |                                                 |                                                               |
|----------------------|------------|-------|----------------------|-----------------|-------------------------------------------------|---------------------------------------------------------------|
| <b>Zhang 2023</b>    | 64 (58-68) | 5/5   | Chinese, 10<br>(100) | 39m (25-78)     | 0 – 1 (10)<br>1 – 3 (30)<br>2 – 6 (60)          | I – 2 (20)<br>II – 5 (50)<br>III – 3 (30)                     |
| <b>Minakata 2023</b> | 54 (38-73) | 7/2   | Asian, 9 (100)       | 3.6y (1.0-7.9)  | 0 – 6 (67)<br>1 – 3 (33)<br>2 – 0               | I – 2 (22)<br>II – 4 (44)<br>III – 2 (22)<br>Unknown – 1 (11) |
| <b>Sanoyan 2023</b>  | 69 (57-83) | 11/5  | NR                   | 7.7y (2.1-16.7) | 0 – 11 (69)<br>1 – 4 (25)<br>2 – 1 (6)          | I – 6 (38)<br>II – 7 (44)<br>III – 3 (19)                     |
| <b>Hansen 2023</b>   | 64 (36-83) | 91/68 | NR                   | NR              | 0-1 – 127 (81)<br>2-4 – 29 (19)<br>Unknown – 31 | I – 22 (17)<br>II – 71 (55)<br>III – 35 (27)<br>Unknown – 31  |

NR: Not Reported.

**Table S5.** MINORS – Quality Assessment.

| Study              | MINORS EVALUATION |    |     |    |   |    |     |     | Total |
|--------------------|-------------------|----|-----|----|---|----|-----|-----|-------|
|                    | I                 | II | III | IV | V | VI | VII | VII |       |
| Raje 2019          | 2                 | 2  | 2   | 2  | 2 | 2  | 2   | 0   | 14    |
| Xu 2019            | 2                 | 2  | 2   | 1  | 1 | 2  | 2   | 0   | 12    |
| Cohen 2019         | 2                 | 2  | 2   | 2  | 2 | 0  | 2   | 0   | 12    |
| Yan 2020           | 2                 | 2  | 2   | 2  | 1 | 2  | 2   | 0   | 13    |
| Chen 2020          | 2                 | 2  | 2   | 1  | 1 | 2  | 2   | 0   | 12    |
| Wang 2021          | 2                 | 2  | 2   | 2  | 1 | 1  | 2   | 0   | 12    |
| Cornell 2021       | 2                 | 2  | 2   | 2  | 1 | 2  | 2   | 0   | 13    |
| Mei 2021           | 2                 | 2  | 2   | 2  | 2 | 2  | 2   | 0   | 14    |
| Munshi 2021        | 2                 | 2  | 2   | 2  | 2 | 2  | 2   | 2   | 16    |
| Zhang 2022         | 2                 | 2  | 2   | 2  | 2 | 2  | 2   | 0   | 14    |
| Du 2022            | 2                 | 2  | 2   | 2  | 2 | 2  | 2   | 0   | 14    |
| Wang 2022          | 2                 | 2  | 2   | 2  | 2 | 2  | 2   | 0   | 14    |
| Zhao 2022          | 2                 | 2  | 2   | 2  | 2 | 2  | 2   | 0   | 14    |
| Mailankody 2022    | 2                 | 2  | 2   | 2  | 1 | 2  | 2   | 0   | 13    |
| Qu 2022            | 2                 | 2  | 2   | 2  | 2 | 2  | 2   | 0   | 14    |
| Tang 2022          | 2                 | 2  | 2   | 2  | 1 | 2  | 2   | 0   | 13    |
| Ri 2022            | 2                 | 2  | 2   | 2  | 1 | 1  | 2   | 2   | 14    |
| Martin 2022        | 2                 | 2  | 2   | 2  | 2 | 2  | 2   | 2   | 16    |
| Mi 2022            | 2                 | 2  | 2   | 2  | 2 | 2  | 2   | 2   | 16    |
| Asherie 2022       | 2                 | 2  | 2   | 2  | 1 | 1  | 2   | 2   | 14    |
| Cohen 2023         | 2                 | 2  | 2   | 2  | 1 | 2  | 2   | 0   | 13    |
| Xia 2023           | 2                 | 2  | 2   | 2  | 2 | 1  | 2   | 0   | 13    |
| Mailankody 2023    | 2                 | 2  | 2   | 1  | 2 | 2  | 2   | 0   | 13    |
| Lee 2023           | 2                 | 2  | 2   | 2  | 1 | 0  | 2   | 2   | 13    |
| Oliver-Caldés 2023 | 2                 | 2  | 2   | 2  | 2 | 2  | 2   | 0   | 14    |
| Zhang 2023         | 2                 | 2  | 2   | 2  | 1 | 1  | 2   | 0   | 12    |
| Minakata 2023      | 2                 | 2  | 2   | 2  | 1 | 2  | 2   | 2   | 15    |
| Sanoyan 2023       | 2                 | 2  | 1   | 2  | 1 | 1  | 2   | 0   | 11    |
| Hansen 2023        | 2                 | 2  | 1   | 2  | 1 | 1  | 2   | 0   | 11    |

I, A clearly stated aim; II, Inclusion of consecutive patients; III, Prospective collection of data; IV, Endpoints appropriate to the aim of the study; V, Unbiased assessment of the study endpoint; VI, Follow-up period appropriate to the aim of the study; VII, Loss to follow up less than 5%; VIII, Prospective calculation of the study size.



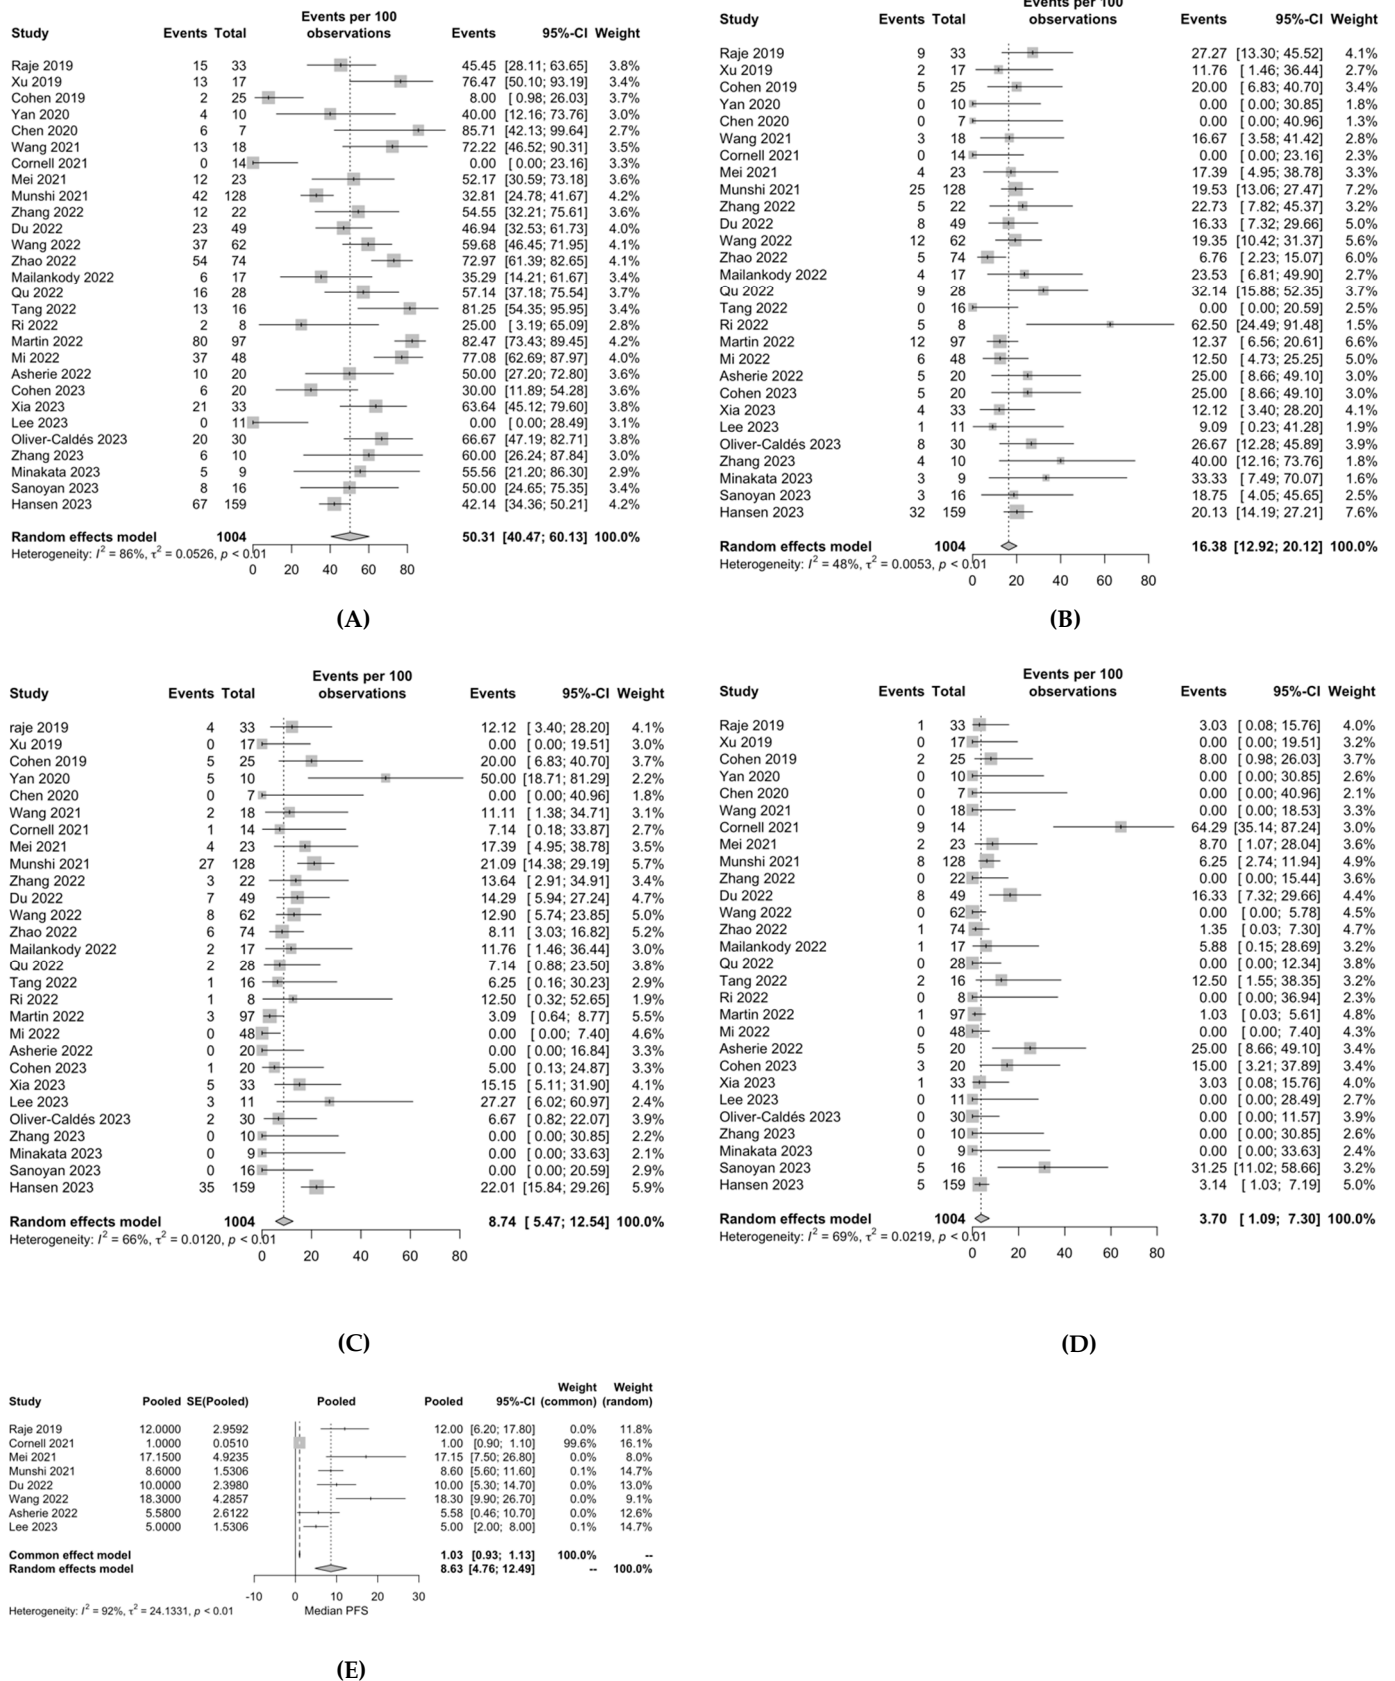

Figure S1. Efficacy outcomes: (A) CRR; (B) vgPR; (C) PR; (D) PD; (E) mPFS.

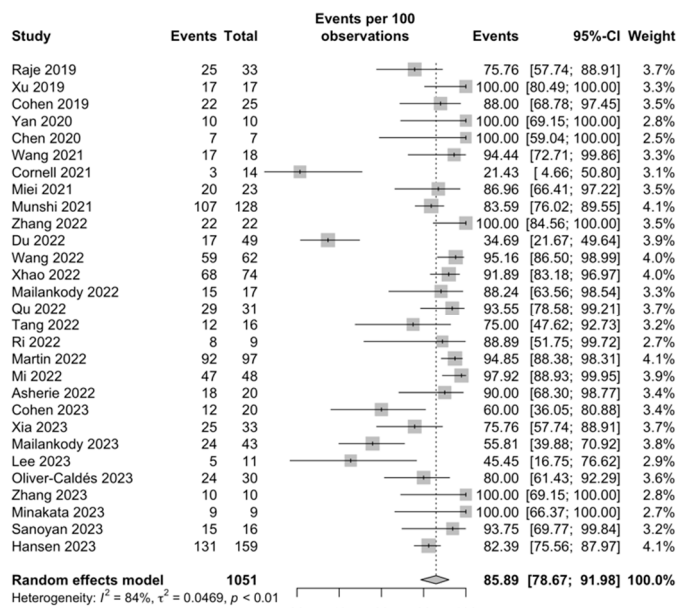

(A)

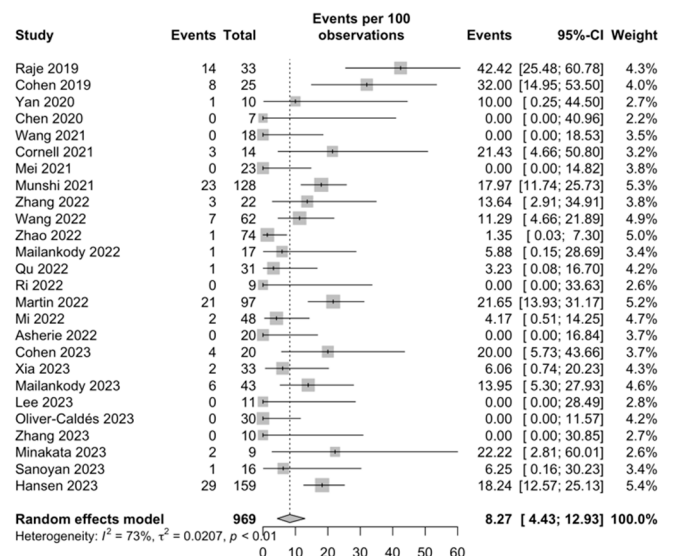

(B)

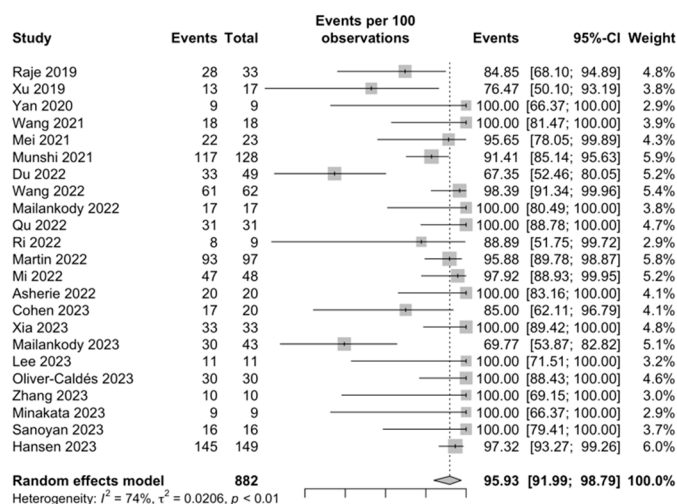

(C)

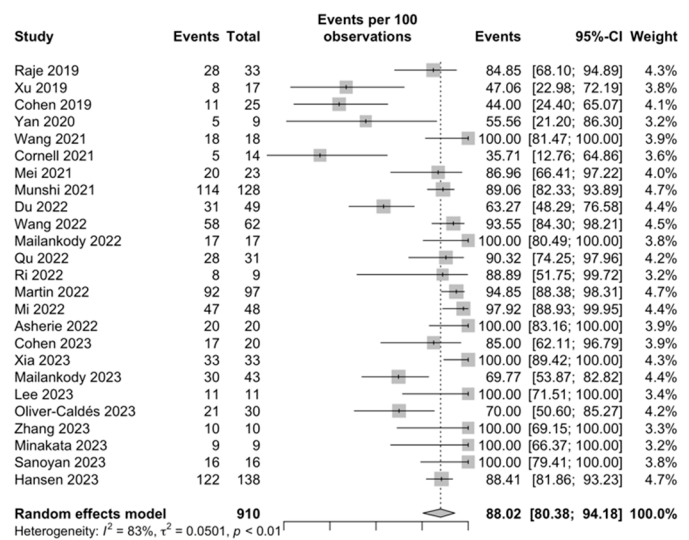

(D)

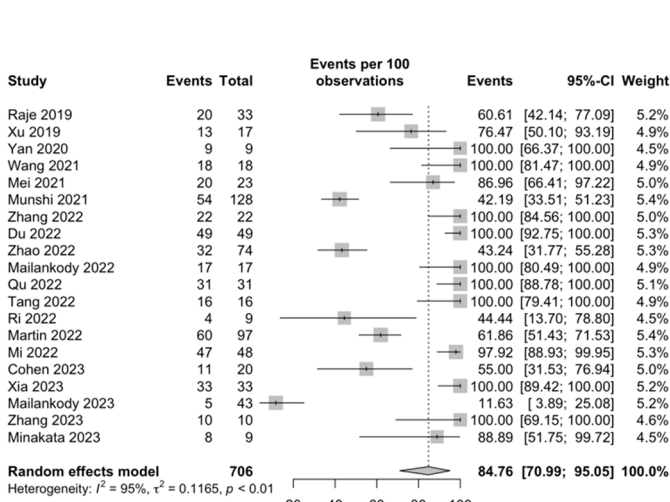

(E)

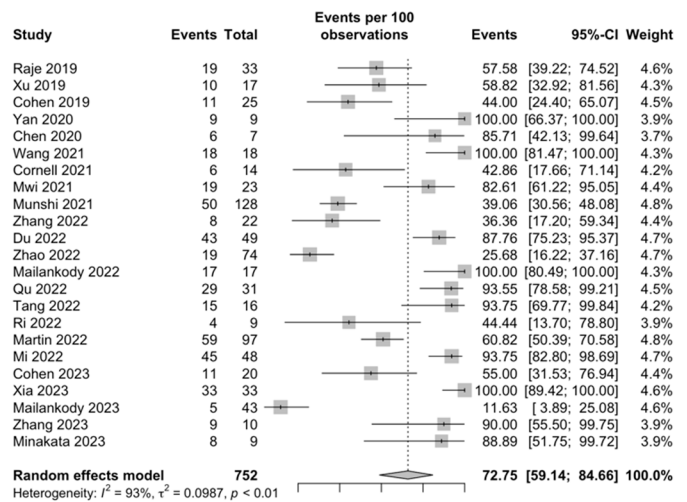

(F)

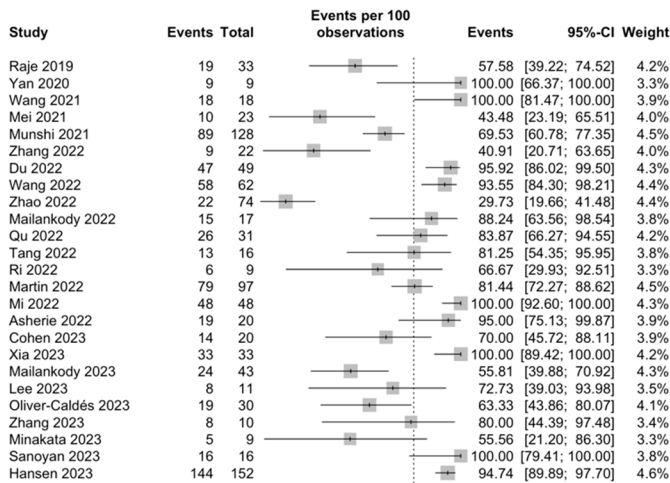

(G)

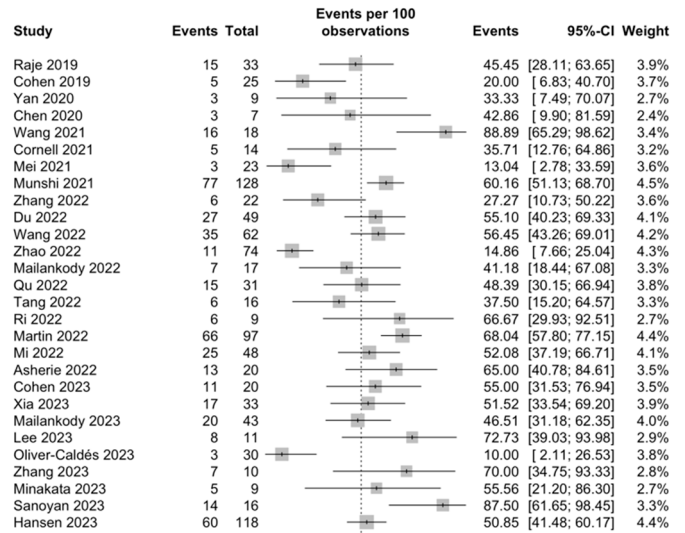

(H)

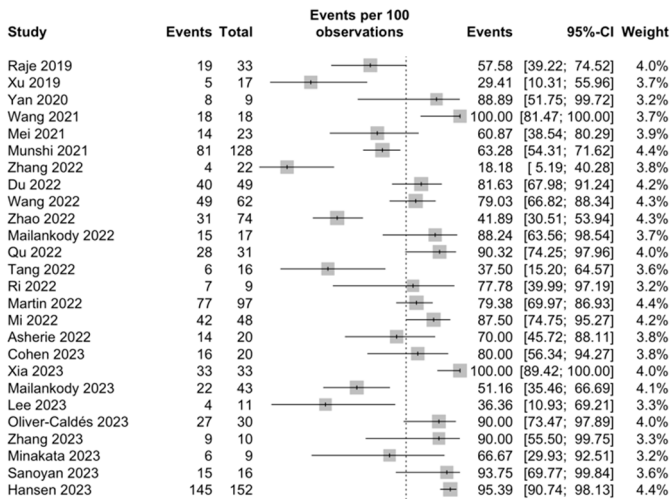

(I)

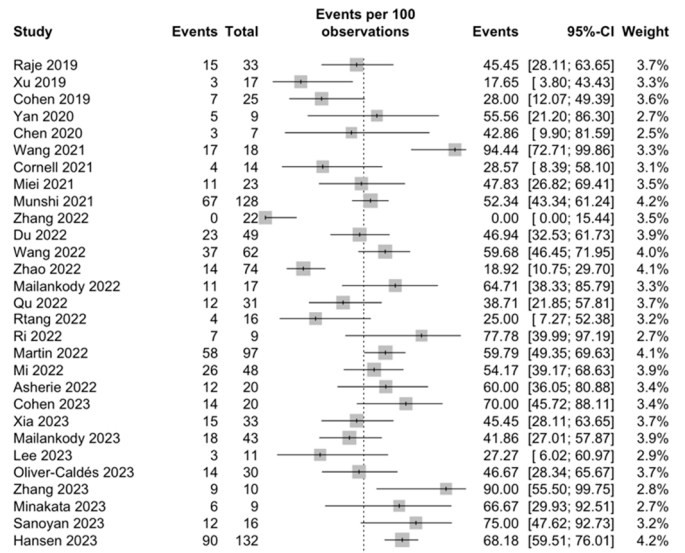

(J)

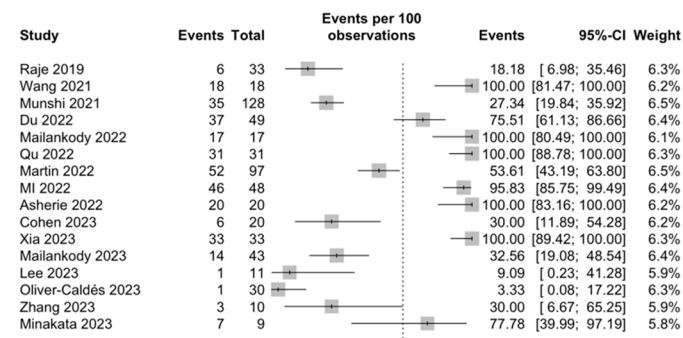

(K)

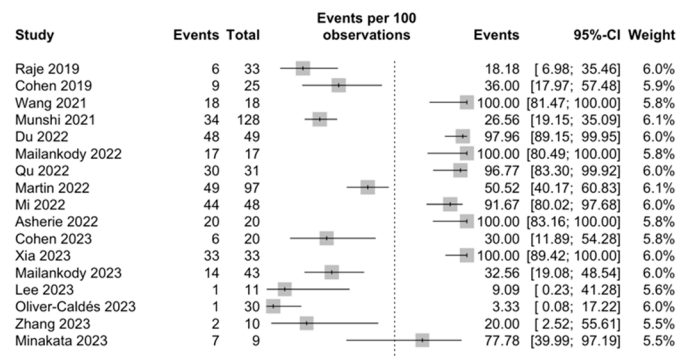

(L)

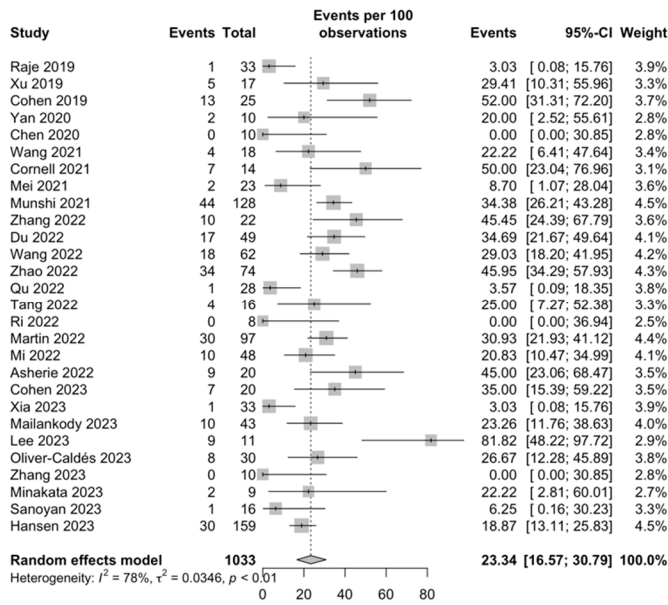

(M)

**Figure S2.** Safety outcomes: (A) any grade CRS; (B) any grade neurotoxicity; (C) any grade neutropenia; (D) grade  $\geq 3$  neutropenia; (E) any grade leukopenia; (F) grade  $\geq 3$  leukopenia; (G) any grade anemia; (H) grade  $\geq 3$  anemia; (I) any grade thrombocytopenia; (J) grade  $\geq 3$  thrombocytopenia (K) any grade lymphopenia; (L) grade  $\geq 3$  lymphopenia; (M) all-cause mortality.

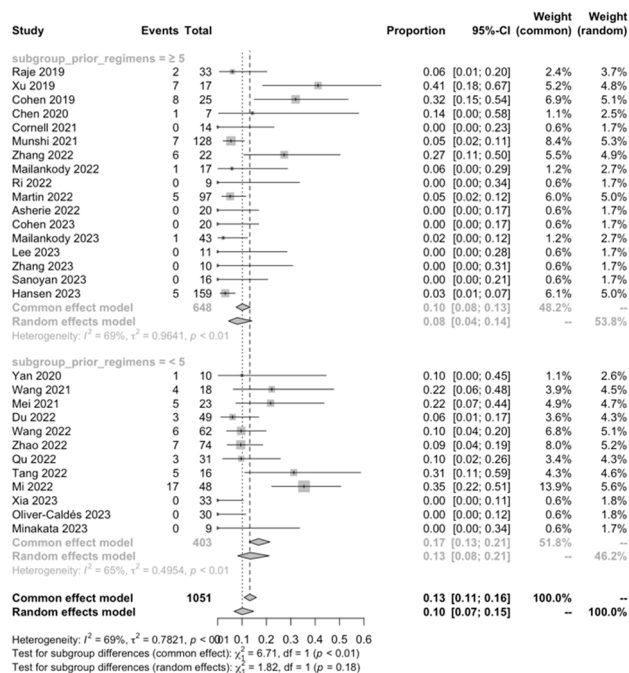

(A)

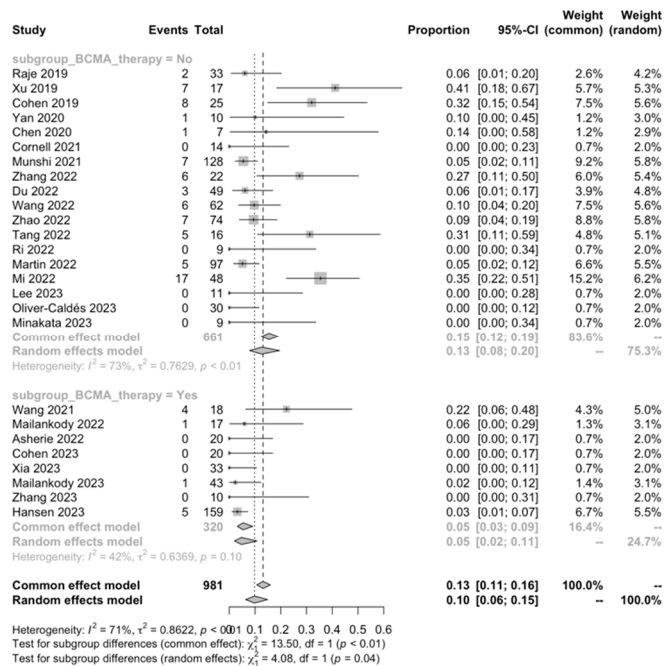

(B)

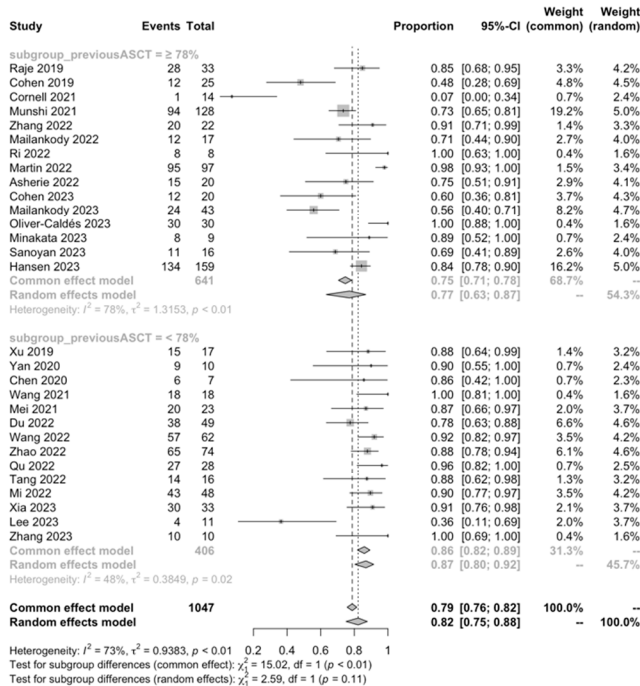

(C)

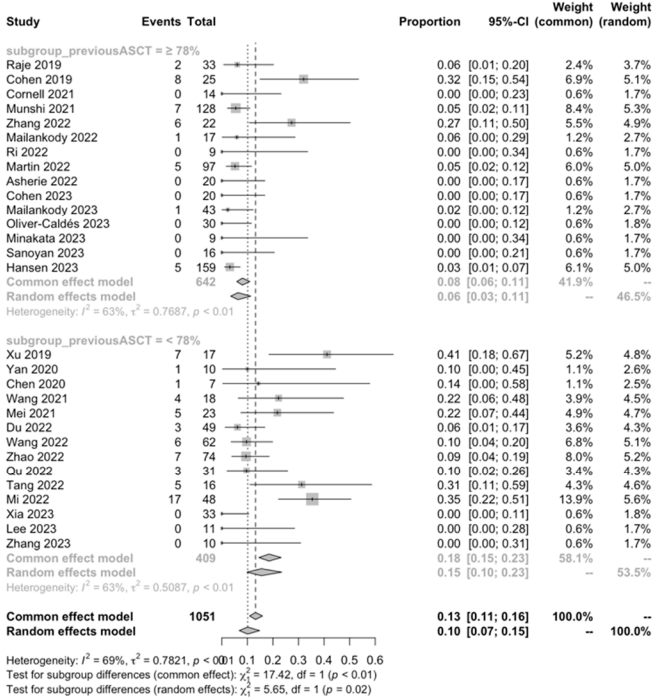

(D)

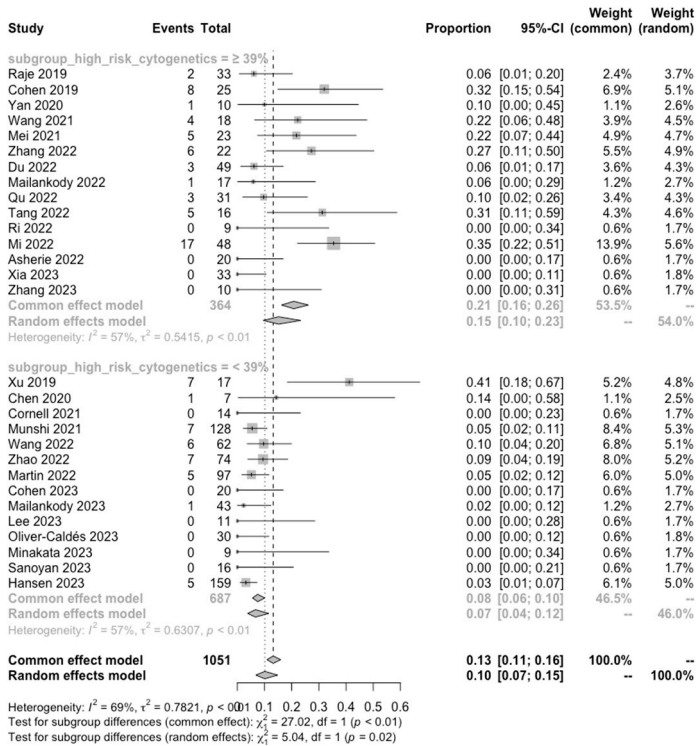

(E)

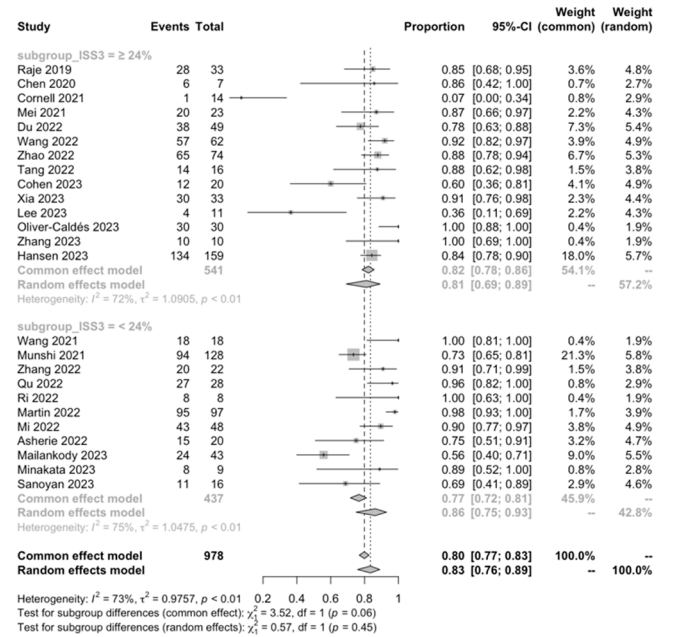

(F)

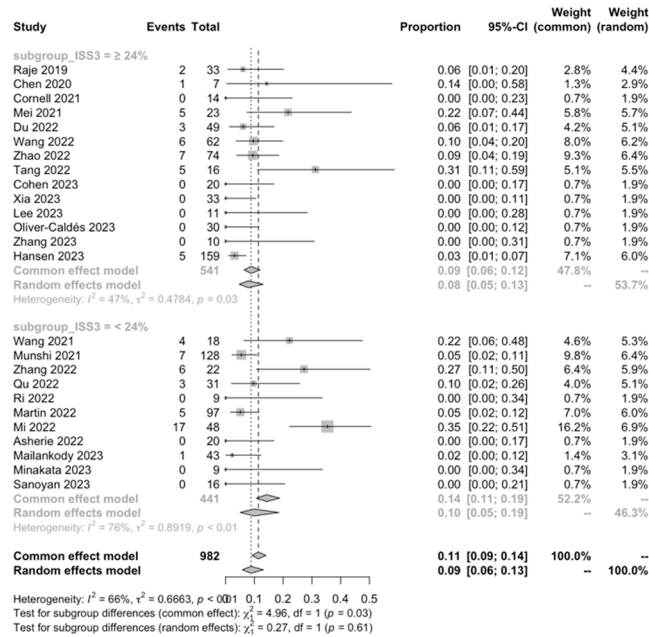

(G)

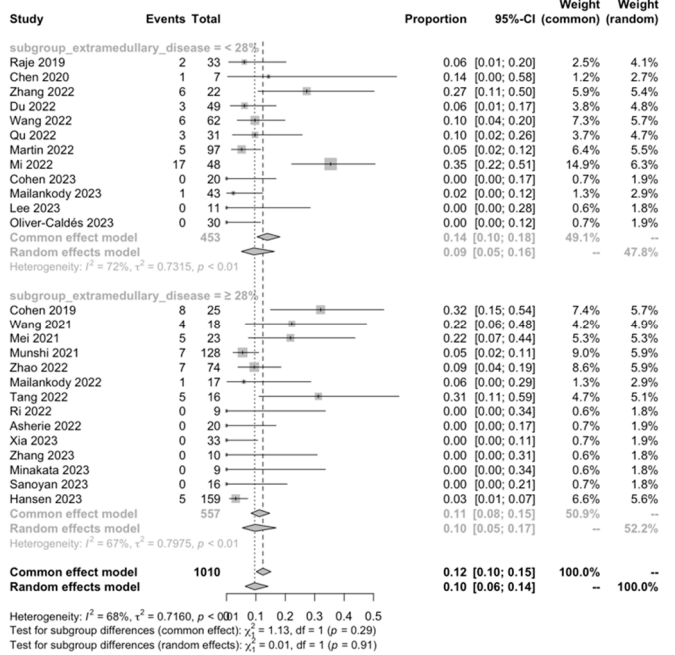

(H)



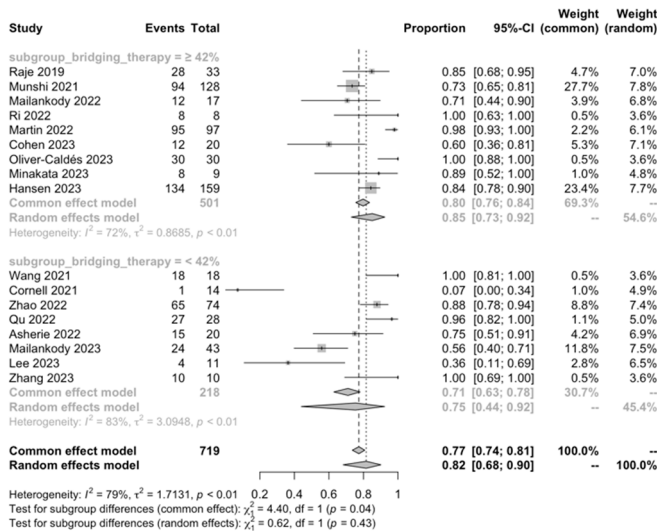

(I)

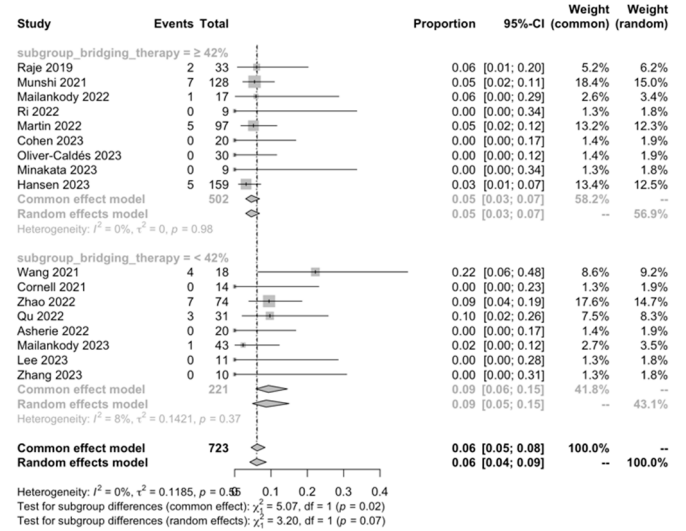

(J)

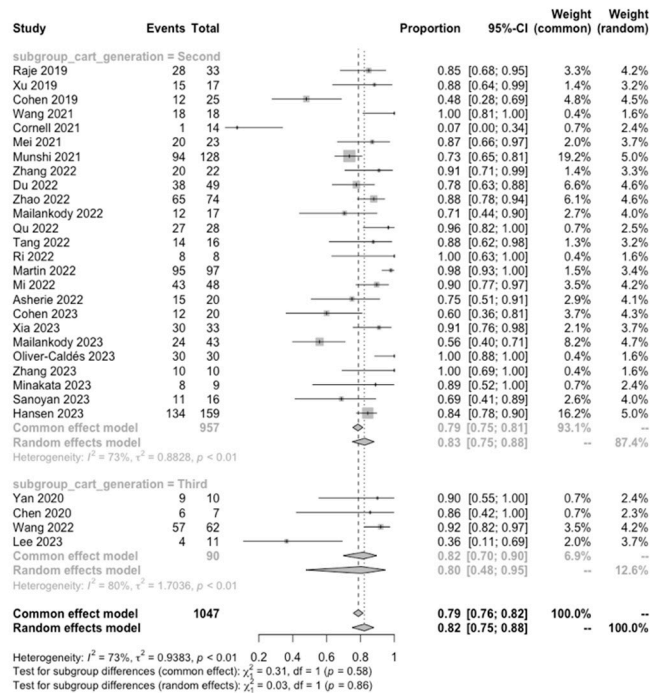

(K)

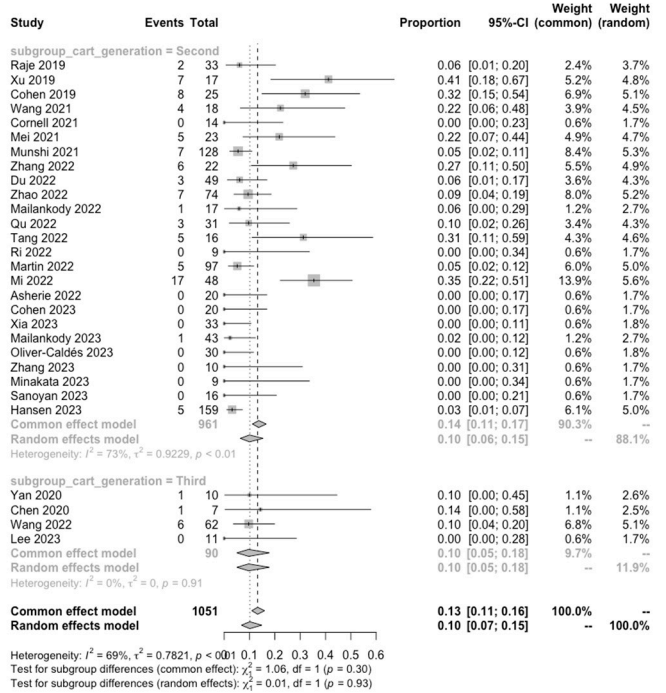

(L)

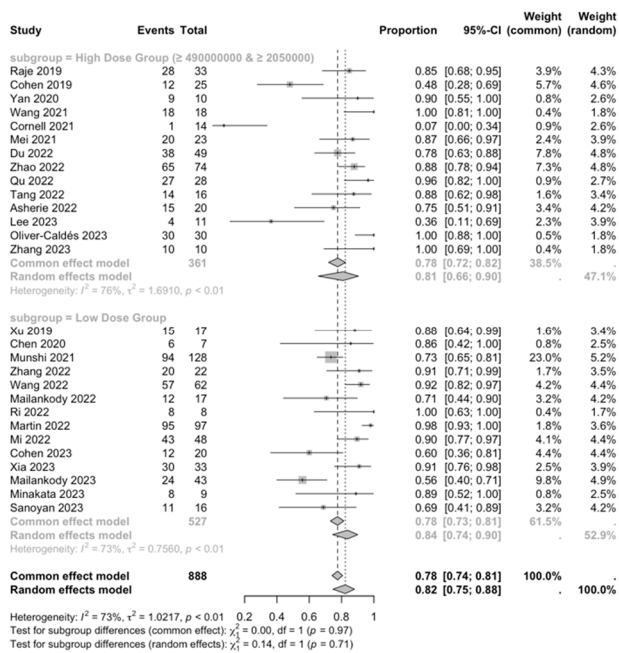

(M)

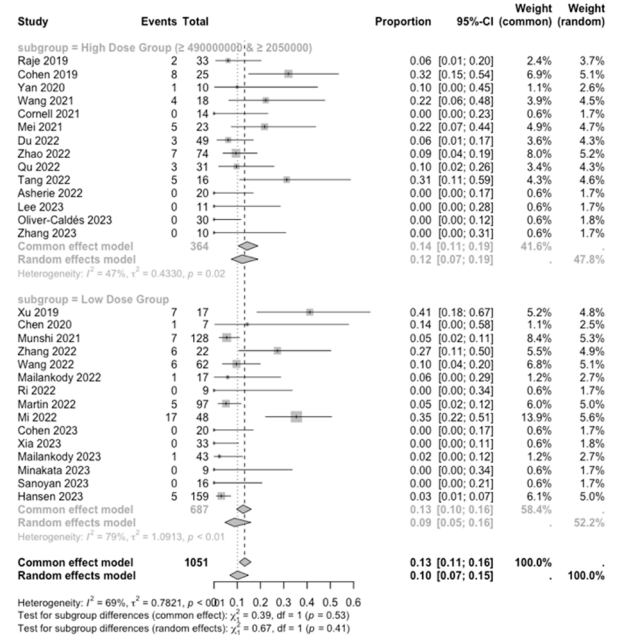

(N)

**Figure S3.** Subgroup analysis : (A) grade  $\geq 3$  CRS, prior antimyeloma regimens; (B) grade  $\geq 3$  CRS, prior exposure to BCMA therapy; (C) ORR, prior ASCT; (D) grade  $\geq 3$  CRS, prior ASCT; (E) grade  $\geq 3$  CRS, high-risk cytogenetics; (F) ORR, ISS stage 3; (G) grade  $\geq 3$  CRS, ISS stage 3; (H) grade  $\geq 3$  CRS, extramedullary disease; (I) ORR, bridging therapy; (J) grade  $\geq 3$  CRS, bridging therapy; (K) ORR, CAR-T generation; (L) grade  $\geq 3$  CRS, CAR-T generation; (M) ORR, upper infusion threshold; (N) grade  $\geq 3$  CRS, upper infusion threshold.
